# Supplementary material for: Antioxidant Efficacy of Green-Synthesized Silver Nanoparticles Promotes Wound Healing in Mice
Source: MDPI journal article supplement (doi:10.3390/pharmaceutics15051517), 2023-05-17
Supplement: s1 [file s1]

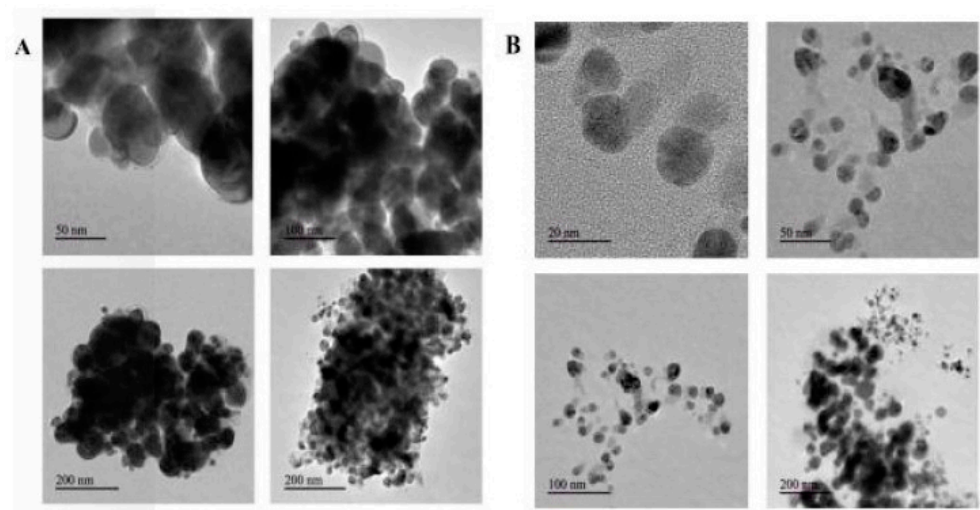

**Figure S1.** TEM images of biosynthesized silver nanoparticles from (A) *Catharanthus roseus* and (B) *Azadirachta indica* plant extracts [34].

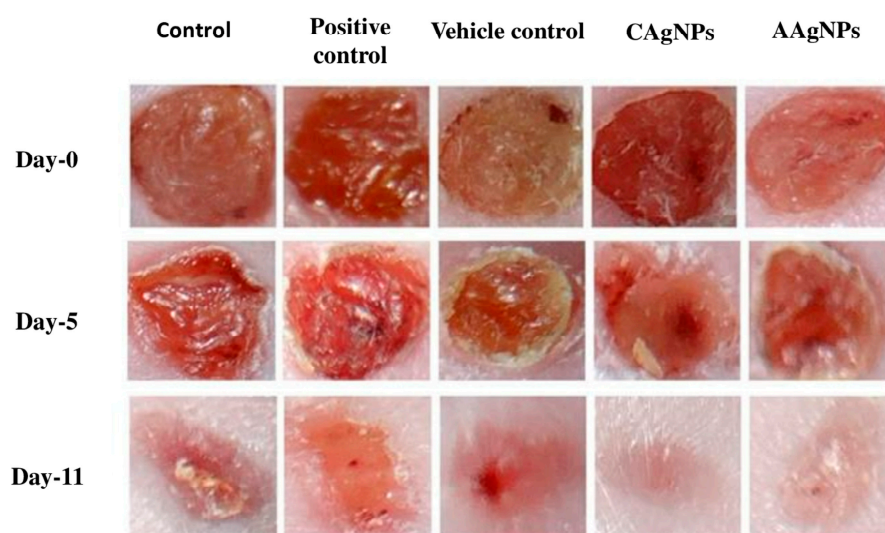

(a)

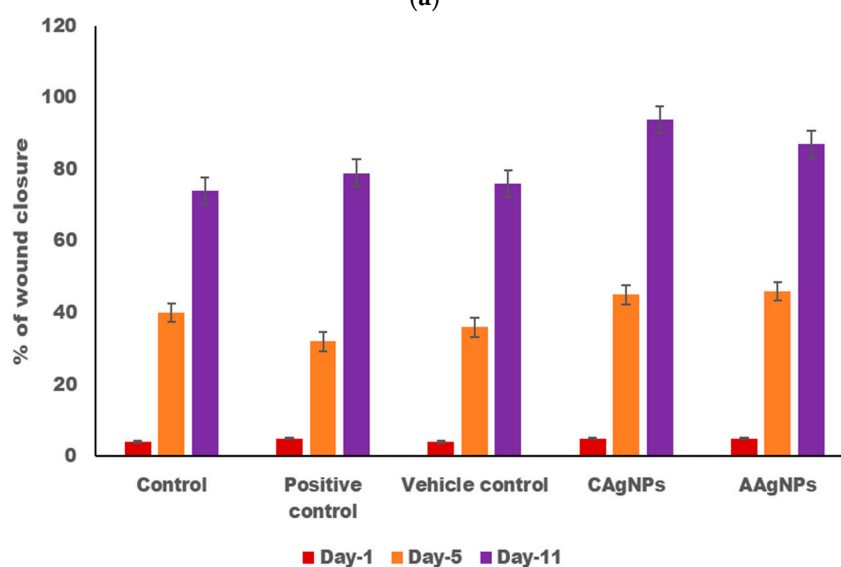

(b)

**Figure S2.** (a): Representative photographs showing wound closure after treatment with green-synthesized silver nanoparticles of *Catharanthus roseus* and *Azadirachta indica*. (b): Graphical representation of percent of wound closure after treatment with green-synthesized silver nanoparticles of *Catharanthus roseus* and *Azadirachta indica*.
